# Supplementary material for: miRNA-375 a Sensor of Glucotoxicity Is Altered in the Serum of Children with Newly Diagnosed Type 1 Diabetes
Source: Hindawi journal article supplement (doi:10.1155/2016/1869082), 2016-01-01
Supplement: f1 [file 1869082.f1.pdf]

**Supplementary Table 1:** miRNA expressions in human islets (n=3) quantified by using TaqMan Low Density arrays V3  
Values are expressed as Ct. Ct levels are inversely proportional to the amount of target nucleic acid in the sample (*i.e.*; the lower the Ct level the greater the amount of target nucleic acid in the sample).

| miRNA I.D             | Mean expressions | SEM                |
|-----------------------|------------------|--------------------|
| hsa-miR-375-000564    | 11.4090424219759 | 0.182809537379463  |
| hsa-miR-200c-002300   | 14.0934844496006 | 0.234221559627277  |
| hsa-miR-24-000402     | 14.1134897490604 | 0.231106915702722  |
| hsa-miR-30b-000602    | 15.0949010659397 | 0.214068760388162  |
| hsa-miR-30c-000419    | 15.4279378605923 | 0.394256492932443  |
| hsa-miR-1274B-002884  | 15.4285383989337 | 0.400049818333967  |
| hsa-miR-21-000397     | 15.4374777704743 | 0.372748988866631  |
| hsa-miR-222-002276    | 15.4444014092248 | 0.217767863589828  |
| hsa-miR-19b-000396    | 15.7687635818389 | 0.513220278550786  |
| hsa-miR-29a-002112    | 16.0953071520909 | 0.178968231515176  |
| hsa-miR-132-000457    | 16.0990403307267 | 0.184992717255149  |
| hsa-miR-191-002299    | 16.1069318728026 | 0.188584596185825  |
| hsa-miR-26a-000405    | 16.1125767927299 | 0.177743313349618  |
| hsa-miR-200b-002251   | 16.1216044910452 | 0.184428357616407  |
| hsa-miR-720-002895    | 16.4708311733682 | 0.316163771556956  |
| hsa-let-7e-002406     | 16.4824487599673 | 0.211047871099023  |
| hsa-miR-409-3p-002332 | 16.7748324541101 | 0.564883241030902  |
| hsa-miR-125b-000449   | 16.7883268043984 | 0.392962416406514  |
| hsa-miR-204-000508    | 16.7941683200965 | 0.383893193594959  |
| hsa-miR-19a-000395    | 17.0965375676568 | 1.27116921031708   |
| hsa-miR-146a-000468   | 17.1042475827262 | 0.672015180741739  |
| hsa-miR-484-001821    | 17.1162101919164 | 0.158754789440184  |
| hsa-miR-16-000391     | 17.1269269387294 | 0.15963744611319   |
| hsa-miR-126-002228    | 17.1345214674815 | 0.502746733436366  |
| hsa-miR-331-000545    | 17.148806407232  | 0.153186163272155  |
| hsa-miR-30a-5p-000417 | 17.4497600544813 | 0.355031698288309  |
| hsa-miR-200a-000502   | 17.464932964317  | 0.359791164175439  |
| hsa-miR-127-000452    | 17.4652772900597 | 0.245587040186211  |
| hsa-let-7b-002619     | 17.4975937975806 | 0.256589215367391  |
| hsa-miR-342-3p-002260 | 17.8219757308135 | 0.370851152881512  |
| hsa-miR-17-002308     | 18.1275018627528 | 0.130948315053603  |
| hsa-miR-106a-002169   | 18.1317013083463 | 0.126772454023422  |
| hsa-miR-145-002278    | 18.1368087278384 | 0.131407644987706  |
| hsa-miR-574-3p-002349 | 18.1423665779698 | 0.12896413093285   |
| hsa-miR-95-000433     | 18.1634788319214 | 0.136956556759084  |
| mmu-miR-129-3p-001184 | 18.4453293273511 | 0.450756147416686  |
| hsa-miR-141-000463    | 18.4532995882529 | 0.345910812870931  |
| hsa-miR-148a-000470   | 18.4556713953297 | 0.344879375004883  |
| hsa-miR-20a-000580    | 18.4649178286669 | 0.341727106450158  |
| hsa-miR-197-000497    | 18.4735414037111 | 0.25867491313089   |
| hsa-let-7a-000377     | 18.4820239479466 | 0.265224990315383  |
| hsa-miR-376c-002122   | 18.4826212072075 | 0.345911650216952  |
| hsa-miR-192-000491    | 18.4843354963091 | 0.350091825426071  |
| hsa-miR-328-000543    | 18.520341892281  | 0.256924100053734  |
| hsa-miR-194-000493    | 18.7855408929339 | 0.451822042173857  |
| hsa-miR-539-001286    | 18.7868306701539 | 0.369797351574105  |
| hsa-miR-30d-000420    | 18.7971852207831 | 0.574976745567401  |
| hsa-miR-30e-3p-000422 | 18.8045470098177 | 0.0191827321762508 |
| hsa-miR-320-002277    | 18.8075498668956 | 0.375735556507022  |
| hsa-miR-382-000572    | 18.8098474734739 | 0.37904665676117   |

|                        |                  |                    |
|------------------------|------------------|--------------------|
| hsa-miR-30a-3p-000416  | 18.8220410183364 | 0.0165462579460382 |
| hsa-miR-664-002897     | 18.8299808653899 | 0.564566622464326  |
| dme-miR-7-000268       | 18.8481491231155 | 0.578978934127703  |
| hsa-miR-221-000524     | 19.1265967105866 | 0.115563607446111  |
| hsa-miR-26b-000407     | 19.1293273744793 | 0.114372142744331  |
| hsa-miR-146b-001097    | 19.1332550330529 | 0.111002097925007  |
| mmu-miR-374-5p-001319  | 19.1349065074427 | 0.110511046811392  |
| hsa-miR-27b-000409     | 19.1371678890921 | 0.114672947667144  |
| hsa-let-7g-002282      | 19.1403490266576 | 0.10907322751419   |
| hsa-miR-193b-002367    | 19.1490271811442 | 0.111815714854385  |
| hsa-miR-210-000512     | 19.4675115456953 | 0.326371923236268  |
| hsa-miR-23b-000400     | 19.5030288601023 | 0.294599583047125  |
| rno-miR-7*-001338      | 19.5151505281824 | 0.339117733483318  |
| hsa-miR-181a-000480    | 19.5453455138915 | 0.351573035350457  |
| hsa-miR-744-002324     | 19.8069638816045 | 0.367648579432308  |
| hsa-miR-487b-001285    | 19.8120742733488 | 0.376803078844519  |
| hsa-miR-151-3p-002254  | 19.8136708821324 | 0.0307385743274403 |
| hsa-miR-1274A-002883   | 19.8206437617675 | 0.0377995189711924 |
| hsa-miR-642-001592     | 19.8228365098135 | 0.367266515470931  |
| hsa-miR-92a-000431     | 19.8330256297342 | 0.248323646065452  |
| hsa-miR-27a-000408     | 19.8583675236368 | 0.245876480696219  |
| hsa-miR-532-001518     | 20.1426328415336 | 0.0791857375462127 |
| hsa-miR-660-001515     | 20.148841183087  | 0.076228797813496  |
| hsa-miR-374-000563     | 20.1502214114813 | 0.0822827453750824 |
| hsa-miR-365-001020     | 20.1510631056561 | 0.0989240773293898 |
| hsa-miR-335-000546     | 20.1536234051327 | 0.089637245890432  |
| hsa-miR-100-000437     | 20.154933111675  | 0.0629429540474335 |
| hsa-miR-186-002285     | 20.1556099792453 | 0.0834534658322001 |
| hsa-miR-411-001610     | 20.1568708706866 | 0.0838854315730358 |
| hsa-miR-125a-5p-002198 | 20.1573129308247 | 0.0809357856335579 |
| hsa-miR-28-3p-002446   | 20.1578218599755 | 0.0838485517857794 |
| hsa-miR-22-000398      | 20.1586539620378 | 0.074095946511152  |
| hsa-miR-532-3p-002355  | 20.1599698439452 | 0.0820821820640531 |
| hsa-miR-429-001024     | 20.1605099099397 | 0.0780504127603588 |
| hsa-miR-15b-000390     | 20.1610807113162 | 0.07997562873435   |
| hsa-miR-103-000439     | 20.1634837035013 | 0.0897446609827177 |
| hsa-miR-106b-000442    | 20.1654064238867 | 0.0813582080417763 |
| hsa-miR-139-5p-002289  | 20.4728046306789 | 0.390959712142676  |
| hsa-miR-432-001026     | 20.4740085624354 | 0.875464732893362  |
| hsa-miR-652-002352     | 20.4842888711683 | 0.411615745894722  |
| mmu-miR-140-001187     | 20.4990065971319 | 0.326887236112337  |
| hsa-let-7d-002283      | 20.5051726875158 | 0.298225083351915  |
| hsa-miR-301-000528     | 20.5130599520943 | 0.33258330656982   |
| mmu-miR-134-001186     | 20.5218151010663 | 0.31307715749311   |
| hsa-miR-31-002279      | 20.7895111506982 | 0.966470700271451  |
| hsa-miR-199a-3p-002304 | 20.7957793207707 | 0.3956692131026    |
| hsa-miR-216b-002326    | 20.8110570674509 | 0.356565634760327  |
| hsa-miR-323-3p-002227  | 20.8172249161398 | 0.366679864914946  |
| hsa-miR-410-001274     | 20.8244481007092 | 0.371819987433544  |
| hsa-miR-370-002275     | 20.829075344931  | 0.359873538124385  |
| hsa-miR-1275-002840    | 20.8293220982211 | 0.0672171615566211 |
| hsa-miR-151-5P-002642  | 20.8447986367501 | 0.0572478385222907 |
| hsa-miR-34a-000426     | 20.8479454950614 | 0.272255741862512  |
| hsa-miR-376a-000565    | 20.8537921232473 | 0.388119534865556  |
| hsa-miR-135a-000460    | 20.8615355070536 | 0.266427360234909  |
| hsa-let-7f-000382      | 20.8709164330752 | 0.28908169500631   |
| hsa-miR-129*-002298    | 21.1402459095193 | 0.64560185366345   |
| hsa-miR-25-000403      | 21.1434579113167 | 0.0676519290551714 |
| hsa-miR-29c-000587     | 21.1518876731175 | 0.612741388441448  |

|                        |                  |                    |
|------------------------|------------------|--------------------|
| hsa-miR-345-002186     | 21.1535968354312 | 0.0563561652785066 |
| hsa-miR-455-3p-002244  | 21.1545349554228 | 0.0563814037438842 |
| mmu-miR-495-001663     | 21.1571893460174 | 0.0497882895444903 |
| hsa-miR-28-000411      | 21.1584042550473 | 0.0647266188691902 |
| hsa-miR-296-000527     | 21.1604804214817 | 0.0622598087469461 |
| mmu-miR-93-001090      | 21.1641437588525 | 0.0545822875079195 |
| hsa-miR-598-001988     | 21.1656383274126 | 0.059840864679319  |
| hsa-miR-184-000485     | 21.1722395479105 | 0.588458786447635  |
| hsa-miR-324-5p-000539  | 21.1756148991838 | 0.0559327395737723 |
| hsa-miR-149-002255     | 21.1788634467865 | 0.056417621845928  |
| mmu-miR-379-001138     | 21.1806644524868 | 0.0620809239849145 |
| hsa-miR-425-5p-001516  | 21.1871499793091 | 0.0507208234283464 |
| hsa-miR-212-000515     | 21.1938434929201 | 0.0551130391606129 |
| hsa-miR-223-002295     | 21.4923939096612 | 0.385561940176463  |
| hsa-miR-455-001280     | 21.4964686395839 | 0.316305033409589  |
| hsa-miR-324-3p-002161  | 21.5052441719353 | 0.321894634377141  |
| hsa-miR-889-002202     | 21.5177396026014 | 0.321021522993072  |
| hsa-let-7c-000379      | 21.5187812179964 | 0.308971217104676  |
| hsa-miR-433-001028     | 21.8220859971244 | 0.355412920282791  |
| hsa-miR-143-002249     | 21.826416343723  | 0.367255543648316  |
| hsa-miR-218-000521     | 21.8271817358663 | 0.653158081399374  |
| hsa-miR-655-001612     | 21.8341220908569 | 0.359742068386875  |
| hsa-miR-494-002365     | 21.8343903215668 | 0.360732998157617  |
| hsa-miR-7-2*-002314    | 21.8412729042626 | 0.577275939531352  |
| hsa-miR-183*-002270    | 21.8418466183342 | 0.56474494934696   |
| hsa-miR-15a-000389     | 21.8760034099664 | 0.295755348540836  |
| hsa-miR-339-5p-002257  | 22.1567105142001 | 0.0593633184251075 |
| hsa-miR-874-002268     | 22.1642855772968 | 0.0394031477112529 |
| hsa-miR-130b-000456    | 22.1647765920985 | 0.0251994920697329 |
| hsa-miR-183-002269     | 22.1677995711843 | 0.052106489447032  |
| hsa-miR-152-000475     | 22.1690147421133 | 0.0390010927037157 |
| hsa-miR-485-3p-001277  | 22.1695023884322 | 0.0454927396755524 |
| hsa-miR-339-3p-002184  | 22.1705083199227 | 0.0416750076522881 |
| hsa-miR-29b-000413     | 22.1714366728698 | 0.585948358386286  |
| hsa-miR-214-002306     | 22.1760226566728 | 0.0413183075290311 |
| hsa-miR-203-000507     | 22.1773107271859 | 0.0421856985457947 |
| hsa-miR-136*-002100    | 22.18175515683   | 0.30808422029096   |
| hsa-miR-133a-002246    | 22.4978620652156 | 0.378346212990015  |
| hsa-miR-340-002258     | 22.5028198816303 | 0.316671062348874  |
| hsa-miR-10a-000387     | 22.508254528335  | 0.317088176220471  |
| hsa-miR-135b-002261    | 22.514186578841  | 0.319041283094307  |
| hsa-miR-485-5p-001036  | 22.5215244180707 | 0.340107954760916  |
| mmu-miR-491-001630     | 22.5215437246323 | 0.348087540271882  |
| hsa-miR-766-001986     | 22.5229852185879 | 0.397454252868143  |
| hsa-miR-129-000590     | 22.5326825430302 | 0.396073926811334  |
| hsa-miR-150-000473     | 22.5349403774384 | 0.313912693568888  |
| hsa-miR-193a-5p-002281 | 22.5420603810988 | 0.345928083303635  |
| hsa-miR-1260-002896    | 22.5469025518061 | 0.39760664406623   |
| hsa-miR-885-5p-002296  | 22.5493037277487 | 0.922330474986492  |
| hsa-miR-130a-000454    | 22.8320590885957 | 0.342635759284835  |
| hsa-miR-195-000494     | 22.8352239401163 | 0.34777725090094   |
| hsa-miR-668-001992     | 22.8403395200663 | 0.531919265103061  |
| hsa-miR-182-002334     | 22.8407429558257 | 0.363371847835187  |
| hsa-miR-20b-001014     | 22.8414823183821 | 0.356507781131756  |
| hsa-miR-708-002341     | 22.8423612688369 | 0.369735234508271  |
| hsa-miR-128a-002216    | 22.8489245524679 | 0.353856108231434  |
| hsa-miR-590-5p-001984  | 22.8490169564101 | 0.651645709168613  |
| hsa-miR-361-000554     | 22.8509027613104 | 0.366932860319354  |
| hsa-miR-148b-000471    | 22.8608666659115 | 0.307777757414557  |

|                        |                  |                    |
|------------------------|------------------|--------------------|
| hsa-miR-1180-002847    | 22.8623594194136 | 0.0994018431832439 |
| hsa-miR-1233-002768    | 22.8650095170226 | 0.506262335272709  |
| hsa-miR-98-000577      | 22.8851432498905 | 0.844617401068388  |
| hsa-miR-15b*-002173    | 22.892455660711  | 0.0803087146497523 |
| hsa-miR-454-002323     | 23.158909752713  | 0.595497896840699  |
| hsa-miR-217-002337     | 23.1638628242705 | 0.601284002796708  |
| rno-miR-29c*-001818    | 23.1660692382459 | 0.289200465805054  |
| hsa-miR-99b*-002196    | 23.1734981481353 | 1.42181852457395   |
| hsa-miR-22*-002301     | 23.1775812173102 | 0.308125098112742  |
| hsa-miR-200a*-001011   | 23.1783180101893 | 0.28015839656959   |
| hsa-miR-155-002623     | 23.1808287041578 | 0.0259622697063724 |
| hsa-miR-185-002271     | 23.1868133621666 | 0.0219925841781481 |
| hsa-miR-27b*-002174    | 23.195834306372  | 0.282761972376776  |
| hsa-miR-126*-000451    | 23.2015315249484 | 0.873958925427038  |
| hsa-miR-625*-002432    | 23.2046236762441 | 0.706919211545271  |
| hsa-miR-335*-002185    | 23.2054391236521 | 0.276071166699022  |
| hsa-miR-320B-002844    | 23.4951556270779 | 0.811118364971755  |
| hsa-miR-551b-001535    | 23.4999716204682 | 0.313058505211061  |
| hsa-miR-224-002099     | 23.5117329066639 | 0.320765856395697  |
| hsa-miR-489-002358     | 23.5143812471561 | 0.335664751067865  |
| hsa-miR-340*-002259    | 23.5158986580343 | 0.243702245466632  |
| hsa-miR-27a*-002445    | 23.5179634270783 | 0.251648611670133  |
| hsa-miR-590-3P-002677  | 23.5255698013453 | 0.237095460568039  |
| hsa-miR-101-002253     | 23.5267208735724 | 0.309679909992124  |
| hsa-miR-1271-002779    | 23.5290904170373 | 0.384476666228597  |
| hsa-miR-10b-002218     | 23.537846021154  | 0.319206476814607  |
| hsa-miR-886-3p-002194  | 23.5381299634128 | 0.371776439572636  |
| hsa-miR-423-5p-002340  | 23.539618046444  | 0.364378393448899  |
| hsa-miR-654-001611     | 23.5451070652327 | 0.313533982562251  |
| mmu-miR-137-001129     | 23.8256979586283 | 0.321047558126646  |
| hsa-miR-483-5p-002338  | 23.8436203866853 | 0.361896089172278  |
| hsa-miR-142-3p-000464  | 23.8621685329203 | 0.64588188734059   |
| hsa-miR-362-001273     | 23.8640285992258 | 0.37383053864676   |
| hsa-miR-93*-002139     | 23.8669304324743 | 0.577442824365726  |
| hsa-miR-222*-002097    | 23.8697132285042 | 0.115368390627265  |
| hsa-miR-501-001047     | 23.874412691844  | 0.342624218759745  |
| hsa-miR-34a*-002316    | 23.8863251014363 | 0.567800234622023  |
| hsa-miR-886-5p-002193  | 23.8867035189974 | 0.719025594583823  |
| hsa-miR-106b*-002380   | 24.2043562687635 | 0.28816028564568   |
| hsa-miR-1290-002863    | 24.2166564233315 | 0.460379601435911  |
| hsa-miR-31*-002113     | 24.4966070270904 | 0.789751188221013  |
| hsa-miR-9-000583       | 24.5002659133822 | 0.635589884196991  |
| hsa-miR-140-3p-002234  | 24.5268007232618 | 0.320990369888649  |
| hsa-miR-592-001546     | 24.5270410276174 | 0.426070290682527  |
| hsa-miR-337-5p-002156  | 24.5311372610637 | 0.31599095137021   |
| hsa-miR-216a-002220    | 24.5358927732951 | 0.304315427392452  |
| hsa-miR-181a-2*-002317 | 24.5468140073005 | 0.222352256396551  |
| hsa-miR-130b*-002114   | 24.5567093419755 | 0.415174987011857  |
| hsa-miR-500-002428     | 24.5635591737225 | 0.287533774443017  |
| hsa-miR-18a-002422     | 24.8531217646854 | 0.303587935245422  |
| hsa-miR-190b-002263    | 24.8604092716011 | 0.131664853584986  |
| hsa-miR-628-5p-002433  | 24.8752905684645 | 0.373561796450224  |
| hsa-miR-543-002376     | 24.8764911089103 | 0.129815612482662  |
| hsa-miR-769-5p-001998  | 24.8780631749615 | 0.126734721591182  |
| hsa-miR-192*-002272    | 24.8813588300841 | 0.133816827850943  |
| hsa-miR-656-001510     | 24.8845398350725 | 0.605192447382104  |
| hsa-miR-409-5p-002331  | 24.8880755609372 | 0.375435960107633  |
| hsa-miR-502-3p-002083  | 25.1899701677052 | 0.0508459719239248 |
| hsa-miR-383-000573     | 25.1957398033033 | 0.5807663496547    |

|                        |                  |                    |
|------------------------|------------------|--------------------|
| hsa-miR-758-001990     | 25.1970146656219 | 0.0525542481161999 |
| hsa-miR-671-3p-002322  | 25.2028081691425 | 0.0513957104947115 |
| hsa-miR-107-000443     | 25.2114896490784 | 0.0738270063011371 |
| hsa-miR-493-002364     | 25.2146318738192 | 0.0568344802474741 |
| hsa-miR-1179-002776    | 25.2172527569999 | 0.278376528899133  |
| hsa-miR-26b*-002444    | 25.2180421928068 | 0.283380047061739  |
| hsa-miR-342-5p-002147  | 25.2200746109994 | 0.633967740214679  |
| hsa-miR-577-002675     | 25.2202694484962 | 0.272478071529951  |
| hsa-miR-30d*-002305    | 25.2218934644959 | 0.306502882221056  |
| hsa-miR-26a-1*-002443  | 25.2280046227179 | 0.747817071166143  |
| hsa-miR-628-3p-002434  | 25.2306657534156 | 1.23805097224449   |
| hsa-miR-200b*-002274   | 25.4685222421818 | 3.21755065606683   |
| hsa-miR-338-3p-002252  | 25.5226544945415 | 0.315525030680193  |
| hsa-miR-362-3p-002117  | 25.5413394581903 | 0.315814517797675  |
| mmu-miR-96-000186      | 25.544252703943  | 0.297311642909914  |
| hsa-miR-337-3p-002157  | 25.5521711141658 | 0.434686380056238  |
| hsa-miR-629-001562     | 25.5532421049071 | 0.413254145522143  |
| hsa-miR-770-5p-002002  | 25.5536833224393 | 0.907677258006187  |
| hsa-miR-1201-002781    | 25.5577506193428 | 0.196350054216527  |
| hsa-miR-625-002431     | 25.5633044742756 | 0.407045243333541  |
| hsa-miR-523-002386     | 25.5695453879186 | 0.414926840488736  |
| hsa-miR-301b-002392    | 25.8668327567851 | 0.283511800062776  |
| hsa-miR-138-002284     | 25.8673034795056 | 0.274885957903324  |
| hsa-miR-378-002243     | 25.8726866455362 | 0.149552990858376  |
| hsa-miR-425*-002302    | 25.8812587572809 | 0.585045431883207  |
| hsa-miR-29a*-002447    | 25.8849696260884 | 0.60022864124257   |
| hsa-miR-154-000477     | 25.9079850405786 | 0.369538956343245  |
| mmu-miR-153-001191     | 26.2079802782619 | 0.524778584103946  |
| hsa-miR-125a-3p-002199 | 26.2147191945572 | 0.0739075171240879 |
| hsa-miR-744*-002325    | 26.215047758475  | 0.280081751570348  |
| hsa-miR-148b*-002160   | 26.2159471704175 | 0.275623287474995  |
| hsa-miR-452-002329     | 26.218405753228  | 0.0827062754882851 |
| hsa-miR-10b*-002315    | 26.2189204162048 | 0.27483317958235   |
| hsa-miR-15a*-002419    | 26.2204322971522 | 0.29251030249047   |
| hsa-miR-411*-002238    | 26.2246342417578 | 0.271414143713501  |
| hsa-miR-20a*-002437    | 26.2270954533539 | 0.292897636267212  |
| hsa-miR-487a-001279    | 26.238995169716  | 0.0800170247252919 |
| hsa-miR-194*-002379    | 26.2397657512174 | 0.29824540157288   |
| mmu-miR-187-001193     | 26.5468181598508 | 0.27099135974762   |
| hsa-miR-505*-002087    | 26.5542837401737 | 0.440488898579504  |
| hsa-miR-24-2*-002441   | 26.5567098483002 | 0.174339084607129  |
| hsa-miR-486-001278     | 26.5654104484559 | 0.441906606566778  |
| hsa-miR-29b-2*-002166  | 26.5763957040364 | 0.453067937507089  |
| hsa-miR-551b*-002346   | 26.5766682944917 | 0.432451885508622  |
| hsa-miR-338-5P-002658  | 26.8845350228574 | 0.164743296148686  |
| hsa-miR-18a*-002423    | 26.8903285274931 | 0.447163747344664  |
| hsa-miR-33a*-002136    | 26.890755727338  | 0.177669787165707  |
| hsa-miR-597-001551     | 26.891867498501  | 0.635597843572423  |
| hsa-miR-34b-002102     | 26.8924725133612 | 0.45800273344477   |
| hsa-miR-454*-001996    | 26.8956530782042 | 0.586728619727933  |
| hsa-miR-1254-002818    | 26.8959638314307 | 0.173016892998893  |
| hsa-miR-1285-002822    | 26.9008688132568 | 0.187727197862123  |
| hsa-miR-193b*-002366   | 26.9270000463875 | 0.586428730708478  |
| hsa-miR-16-1*-002420   | 27.1942306958985 | 0.517003517796375  |
| hsa-miR-191*-002678    | 27.2100948098121 | 0.278674654037944  |
| hsa-miR-579-002398     | 27.2179322231304 | 0.108313190768649  |
| hsa-miR-19b-1*-002425  | 27.2218599199635 | 0.303176435494796  |
| hsa-miR-145*-002149    | 27.2224705621218 | 0.295825632615731  |
| hsa-miR-891a-002191    | 27.2235682745656 | 0.106682863870426  |

|                        |                  |                   |
|------------------------|------------------|-------------------|
| hsa-miR-329-001101     | 27.2289325872455 | 0.105802633951673 |
| hsa-miR-505-002089     | 27.230336481435  | 0.114286468292848 |
| hsa-miR-654-3p-002239  | 27.2313915123828 | 0.105519786033896 |
| hsa-miR-381-000571     | 27.2332241959513 | 0.102223824728624 |
| hsa-miR-213-000516     | 27.2373523010076 | 0.296319379230575 |
| hsa-miR-380-5p-000570  | 27.2471256407948 | 0.286970759010159 |
| hsa-miR-942-002187     | 27.552902790608  | 0.451468995090841 |
| hsa-miR-141*-002145    | 27.5614762393776 | 0.160689484650308 |
| hsa-miR-497-001043     | 27.5635577804082 | 0.611086646349702 |
| hsa-miR-214*-002293    | 27.5695247328002 | 0.170753999539957 |
| hsa-miR-1270-002807    | 27.5713757599633 | 0.449919314205901 |
| hsa-miR-1-002222       | 27.5793690451588 | 0.256665417685925 |
| hsa-miR-500-001046     | 27.586327318307  | 0.462760127739945 |
| hsa-miR-377-000566     | 27.5964327718087 | 0.248628121708723 |
| hsa-miR-424*-002309    | 27.6223024610923 | 0.867792615673548 |
| hsa-miR-9*-002231      | 27.8860096382716 | 0.430048151430275 |
| hsa-miR-17*-002421     | 27.8953040674828 | 0.447727240429677 |
| hsa-miR-32-002109      | 27.9042794357625 | 0.657470320029399 |
| hsa-miR-424-000604     | 27.9144294996028 | 0.387076554933671 |
| hsa-miR-1226*-002758   | 27.9150286134639 | 0.595206280212977 |
| hsa-miR-541-002201     | 27.9167607172861 | 0.381134683766797 |
| hsa-miR-589-001543     | 27.9170751809285 | 0.183866994906644 |
| hsa-miR-99a*-002141    | 27.9273535496924 | 0.189084322362001 |
| hsa-miR-380-3p-000569  | 27.9426730071321 | 0.915513121996711 |
| hsa-miR-618-001593     | 28.2285590445057 | 0.135894663787753 |
| hsa-miR-876-3p-002225  | 28.2306060503668 | 0.132993553683898 |
| hsa-miR-154*-000478    | 28.2390932962017 | 0.295504336609007 |
| mmu-miR-499-001352     | 28.2428133401724 | 0.555194277088917 |
| hsa-miR-330-5p-002230  | 28.2477499650532 | 0.132576124139899 |
| hsa-miR-542-3p-001284  | 28.2483765211166 | 0.696350367083218 |
| hsa-miR-135b*-002159   | 28.2484552530406 | 0.309392690641575 |
| hsa-miR-511-001111     | 28.5457973919167 | 0.2491825126981   |
| hsa-miR-146b-3p-002361 | 28.5636394765366 | 0.321430492940869 |
| hsa-miR-190-000489     | 28.57893284157   | 0.326952114030758 |
| hsa-miR-125b-1*-002378 | 28.5798380724786 | 0.132714444376395 |
| hsa-miR-873-002356     | 28.5812875467831 | 0.483461088331925 |
| hsa-miR-363-001271     | 28.5838248997542 | 0.329633730910833 |
| hsa-miR-369-3p-000557  | 28.5853570854557 | 0.330174863768209 |
| hsa-miR-876-5p-002205  | 28.5886211567799 | 0.481917001355806 |
| hsa-miR-1300-002902    | 28.5886492971276 | 0.44419301700959  |
| hsa-miR-503-001048     | 28.5980314742355 | 0.482849499619387 |
| hsa-miR-132*-002132    | 28.6022292296972 | 0.479454172541422 |
| hsa-miR-453-002318     | 28.8775934959113 | 0.199680502304858 |
| hsa-miR-520D-3P-002743 | 28.8843977522194 | 1.41705113943455  |
| hsa-miR-1197-002810    | 28.8945799274917 | 0.619581444871978 |
| hsa-miR-616-002414     | 28.9158773654739 | 0.444420924481143 |
| hsa-miR-1303-002792    | 28.9162021122352 | 0.618738114220077 |
| hsa-miR-376a*-002127   | 28.9223181282617 | 0.617937007433571 |
| hsa-miR-512-3p-001823  | 28.9279160922019 | 0.226155370994928 |
| hsa-miR-369-5p-001021  | 28.9309216472652 | 0.413273728486994 |
| hsa-miR-545-002267     | 29.2309447106428 | 0.984697823786375 |
| mmu-miR-496-001953     | 29.2484719891592 | 0.153482485165239 |
| hsa-miR-576-3p-002351  | 29.2531481450111 | 0.159744477943335 |
| hsa-miR-802-002004     | 29.2569042398566 | 0.297015118363453 |
| hsa-miR-147b-002262    | 29.2606050014682 | 0.158402834228673 |
| hsa-miR-127-5p-002229  | 29.2611461547427 | 0.152810405043257 |
| mmu-miR-451-001141     | 29.2623232344012 | 0.737407128159734 |
| hsa-miR-616-001589     | 29.2654742972546 | 0.304070895159879 |
| hsa-miR-450b-5p-002207 | 29.2713651316618 | 0.720576042316267 |

|                        |                  |                   |
|------------------------|------------------|-------------------|
| hsa-miR-1291-002838    | 29.2818079321318 | 0.875833823223302 |
| hsa-miR-488-002357     | 29.5497319652264 | 0.535100263511713 |
| hsa-miR-374a*-002125   | 29.5598816245156 | 0.603911897552144 |
| hsa-miR-517a-002402    | 29.5672368095283 | 0.546552860882747 |
| hsa-let-7i*-002172     | 29.5755290172632 | 0.118509985208285 |
| hsa-miR-544-002265     | 29.5822899979736 | 0.337943309038341 |
| hsa-miR-1248-002870    | 29.5929820737845 | 0.955563079535068 |
| hsa-miR-29b-1*-002165  | 29.6007210717693 | 0.489420452280929 |
| hsa-miR-589-002409     | 29.6008301575357 | 0.508776435820132 |
| hsa-miR-206-000510     | 29.8901747510474 | 1.14643834750509  |
| hsa-miR-550-001544     | 29.9103782474548 | 0.611085648182251 |
| hsa-miR-21*-002438     | 29.9185129448406 | 1.01987663211062  |
| hsa-miR-938-002181     | 29.9232943343771 | 0.224008578555611 |
| hsa-miR-888-002212     | 29.9263577865252 | 0.193081621428335 |
| hsa-miR-26a-2*-002115  | 29.9313359502593 | 0.626518111165838 |
| hsa-miR-1255B-002801   | 29.9327181266186 | 0.232691937486548 |
| hsa-miR-629-002436     | 29.9401431535052 | 0.477918842632935 |
| hsa-miR-221*-002096    | 29.9474428992803 | 0.63066993931932  |
| hsa-miR-122-002245     | 29.9489009354728 | 0.425276545189965 |
| hsa-miR-193a-3p-002250 | 29.9492255277921 | 0.647870293282961 |
| hsa-miR-219-000522     | 29.9732671926094 | 0.483090471692138 |
| hsa-miR-92a-1*-002137  | 30.2485533350249 | 0.306933873629655 |
| hsa-let-7f-2*-002418   | 30.2522271706802 | 0.309307129764978 |
| hsa-miR-542-5p-002240  | 30.293388394879  | 0.733711033983622 |
| hsa-miR-550-002410     | 30.5959621922311 | 0.578963088143269 |
| hsa-miR-450a-002303    | 30.6123313417048 | 0.521972303838087 |
| hsa-miR-34c-000428     | 30.6314403244754 | 0.337743588536212 |
| hsa-miR-372-000560     | 30.8824990462087 | 0.703788743430769 |
| hsa-miR-519a-002415    | 30.9082276761173 | 0.771037259048753 |
| hsa-miR-944-002189     | 30.9361384397778 | 0.611077275281035 |
| hsa-miR-422a-002297    | 30.9428011974893 | 0.419888714931589 |
| hsa-miR-1269-002789    | 30.9556161069313 | 0.630935563218197 |
| hsa-let-7e*-002407     | 30.9568751331653 | 0.643582974595983 |
| hsa-miR-378-000567     | 30.9574732938174 | 0.648936425208819 |
| hsa-miR-377*-002128    | 30.9588776853674 | 0.243666349244201 |
| hsa-miR-548b-5p-002408 | 30.9630841963681 | 0.51375959367261  |
| hsa-miR-875-5p-002203  | 31.2642473316916 | 0.314462414449595 |
| hsa-miR-653-002292     | 31.2659421063981 | 0.197653222046665 |
| hsa-miR-10a*-002288    | 31.2722024885472 | 0.304318691242213 |
| hsa-miR-572-001614     | 31.2748084128571 | 0.299843996595539 |
| hsa-miR-331-5p-002233  | 31.281278583351  | 0.203301308319172 |
| hsa-miR-1276-002843    | 31.2897448936428 | 0.281695382819698 |
| hsa-miR-601-001558     | 31.5688321908737 | 0.678165954181554 |
| hsa-miR-296-3p-002101  | 31.5881440972634 | 0.735787714223993 |
| hsa-miR-144*-002148    | 31.6272668155588 | 0.502529907972765 |
| hsa-miR-548c-5p-002429 | 31.6435363098417 | 0.832760955724481 |
| hsa-miR-517c-001153    | 31.9276607169614 | 0.1695038013774   |
| hsa-miR-570-002347     | 31.9285710307898 | 0.137702626456949 |
| hsa-miR-374b*-002391   | 31.9354150720021 | 0.660043280175497 |
| hsa-miR-519d-002403    | 31.9374556493588 | 0.675738452961195 |
| hsa-miR-142-5p-002248  | 31.9784477984023 | 0.511450599291099 |
| hsa-miR-624-001557     | 32.2230619578564 | 1.71712588950822  |
| hsa-miR-23a*-002439    | 32.2647549796874 | 0.711348040751075 |
| hsa-miR-449-001030     | 32.2671004296342 | 0.4786596908938   |
| hsa-miR-548d-5p-002237 | 32.292205361569  | 0.239635157982789 |
| hsa-miR-519b-3p-002384 | 32.5994168909054 | 0.670113876911554 |
| hsa-miR-1244-002791    | 32.6072386244753 | 0.590757151067653 |
| hsa-miR-449b-001608    | 32.6227298689224 | 0.376368672933425 |
| hsa-miR-627-001560     | 32.6231359402235 | 0.349541376081705 |

|                        |                  |                   |
|------------------------|------------------|-------------------|
| hsa-miR-19a*-002424    | 32.9701182424223 | 0.660403293011517 |
| hsa-miR-147-000469     | 32.9887769976338 | 0.556186342169823 |
| hsa-miR-520c-3p-002400 | 33.2752897333262 | 0.402744123935107 |
| hsa-miR-651-001604     | 33.3028951372187 | 0.255848033563836 |
| hsa-miR-100*-002142    | 33.5962102839617 | 1.04513563593823  |
| hsa-miR-582-3p-002399  | 36.381970804522  | 0.905050776000067 |

| other small RNAs | Mean expressions | SEM               |
|------------------|------------------|-------------------|
| U6 snRNA-001973  | 12.6437093879987 | 0.32846467025933  |
| RNU48-001006     | 13.4416835520095 | 0.192852024367005 |
| RNU44-001094     | 16.1147346053091 | 0.377671789580817 |
